# Supplementary material for: The FAM104 proteins VCF1/2 promote the nuclear localization of p97/VCP
Source: eLife journal article supplement (doi:10.7554/elife.92409), 2023-09-15
Supplement: fig3-figsupp1-data1 [file elife-92409-fig3-figsupp1-data1-v2.zip]

100

100

100

100

100

100

100
