# Supplementary material for: The FAM104 proteins VCF1/2 promote the nuclear localization of p97/VCP
Source: eLife journal article supplement (doi:10.7554/elife.92409), 2023-09-15
Supplement: fig6-data1 [file elife-92409-fig6-data1-v2.zip]

## Sheet: Tabelle1
Figure 6C
	Rep 1	Rep 2	Rep 3	Average	SD
Nh Ctrl	1.83934	1.94137	2.09869	1.9598	0.130653
VCF1 KO	1.46415	1.41589	1.67384	1.51796	0.137135
VCF1/2 KO	1.57669	1.44017	1.6811	1.56599	0.120817
Figure 6D
	Rep 1	Rep 2	Rep 3	Average	SD
50 uM NT	0.543674	0.5151	0.476489	0.511754	0.0337176
25 uM VCF1	0.68299	0.706269	0.597429	0.662229	0.0573132
50 uM VCF1	0.63424	0.694361	0.59485	0.64115	0.0501138
															Summary of combined (averaged) technical replicates, these two data points each are shown
Figure 6F	siControl						siVCF1									siControl		siVCF1
	Rep1	Rep2	Rep3	Rep4	Rep5	Rep6	Rep1	Rep2	Rep3	Rep4	Rep5	Rep6				Rep1	Rep2	Rep1	Rep2
pInd empty	2.64156	2.78351	2.73129	2.88668	2.82906	2.98918	2.12196	2.10145	2.05931	1.94905	1.88229	1.97757			pInd empty	2.71878	2.90164	2.09424	1.9363
pInd p97 WT -dox	2.76989	2.69471	2.72717	2.56145	2.58896	2.55824	2.05902	2.02355	1.99733	1.7952	1.80023	1.7913			pInd p97 WT -dox	2.73059	2.56955	2.02663	1.79558
pInd p97 WT +dox	2.4511	2.49489	2.47572	2.36265	2.34273	2.32525	2.05483	2.01882	1.99227	1.74552	1.79081	1.76269			pInd p97 WT +dox	2.4739	2.34354	2.02197	1.76634
pInd SV40NLS p97 -dox	2.70665	2.62379	2.93968	2.65813	2.63258	2.7055	2.11573	2.02643	2.00162	1.83977	1.8653	1.90185			pInd SV40NLS p97 -dox	2.75671	2.6654	2.04793	1.86898
pInd SV40NLS p97 + dox	5.20551	5.53529	5.55301	5.10359	5.53818	5.96682	6.44214	5.906	6.43008	5.69705	5.99492	5.20496			pInd SV40NLS p97 + dox	5.43127	5.5362	6.25941	5.63231
		Biological Replicate 1
		Biological Replicate 2
