# Supplementary material for: The FAM104 proteins VCF1/2 promote the nuclear localization of p97/VCP
Source: eLife journal article supplement (doi:10.7554/elife.92409), 2023-09-15
Supplement: fig6-figsupp1-data1 [file elife-92409-fig6-figsupp1-data1-v2.zip]

## Sheet: Sheet1
Figure 6- Figure supplement 1C
control		VCF1 KO		VCF 1/2 KO
Rep 1	Rep 2	Rep 1	Rep 2	Rep 1	Rep 2
0.957343	0.94406	0.710599	0.730832	0.755847	0.728074
Figure 6- Figure supplement 1D
	Control	VCF1/2 KO
Rep1	2.83287	2.18832
Rep2	2.67477	2.2366
Rep3	2.50997	2.05904
Rep4	2.90164	1.9363
Rep5	3.68286	2.5661
Average	2.92042	2.19727
SD	0.452257	0.237105
