# Supplementary material for: The FAM104 proteins VCF1/2 promote the nuclear localization of p97/VCP
Source: eLife journal article supplement (doi:10.7554/elife.92409), 2023-09-15
Supplement: fig7-data1 [file elife-92409-fig7-data1-v2.zip]

## Sheet: Tabelle1
Figure 7A
	control						VCF1/2 KO
	Rep1	Rep2	Rep3	Rep4	Rep5	Rep6	Rep1	Rep2	Rep3	Rep4	Rep5	Rep6
	8907	11319	12148	10880	11164	10821	7962	4991	1797	7037	8610	6237
Figure 7B
	control						VCF 1/2 KO
(CB-5083 concentration)	Rep1	Rep2	Rep3	Rep4	Rep5	Rep6	Rep1	Rep2	Rep3	Rep4	Rep5	Rep6
0	81.9173	104.1	111.725	100.063	102.675	99.5202	114.275	71.6336		100.999	123.576	89.5169
25	62.6221	94.5815	99.3363	86.203	112.644	100.247	77.0302	91.311	79.1113	107.142	73.7721	123.647
50	90.1117	79.6548	90.4152	115.173	101.396	74.7712	78.3793	76.8149	66.8973	85.4264	70.1984	84.6801
100	65.1236	77.1165	76.4727	77.2084	82.1104	86.9112	44.9378	44.1485	8.53977	66.4954	82.9865	16.7925
200	40.8345	56.6072	36.3832	39.2526	51.7421	61.4356	12.702	18.8593	9.42963	28.619	11.0945	40.6895
Figure 7C
	control						VCF 1/2 KO
(CB-5083 concentration)	Rep1	Rep2	Rep3	Rep4	Rep5	Rep6	Rep1	Rep2	Rep3	Rep4	Rep5	Rep6
0	96.1632	146.901	71.4487	110.638	116.181	58.668	112.526	48.3555		54.7236	135.13	149.265
25	102.323	124.034	101.784	156.063		87.4631	58.7124	63.8209	44.8565	26.802	99.1603	58.6424
50	114.949	44.5785	41.6528	169.845	142.743	37.2642	40.6578	57.1029	43.8069	45.7663	39.6081	23.163
100	56.2043	125.035	35.8784	111.177	118.722	72.5266	61.8614	18.1246	6.64801	40.8677	51.7845	8.39748
200	53.5096	32.1827	20.095	44.0395	100.244	85.4613	11.1267	27.3618	11.3366	12.1064	17.7747	17.7047
Figure 7D
		VCF1 iso1/2					VCF1 iso 2
		Untreated	24h0.8uMCB-5083				Untreated	24h0.8uMCB-5083
	Rep1	1	1.85645			Rep1	1	1.46952
	Rep2	1	2.15894			Rep2	1	1.74209
	Rep3	1	1.822			Rep3	1	1.58
Figure 7F
	Control				VCF1/2KO
	Rep1	Rep2	Rep3	Rep4	Rep1	Rep2	Rep3	Rep4
Untreated	1.94663	1.99237	1.92528	1.90865	1.6052	1.65538	1.57954	1.49664
6h 1uM CB-5083	1.61313	1.67202	1.46998	1.38842	1.43439	1.35437	1.31509	1.0937
24h 0.5 uM CB-5083	1.39764	1.44228	1.26367	1.46394	1.32928	1.31468	1.11994	1.27572
