# Supplementary material for: The FAM104 proteins VCF1/2 promote the nuclear localization of p97/VCP
Source: eLife journal article supplement (doi:10.7554/elife.92409), 2023-09-15
Supplement: fig7-figsupp1-data1 [file elife-92409-fig7-figsupp1-data1-v2.zip]

## Sheet: Sheet1
Figure 7 - figure supplement 1
	Ctrl			VCF1 Iso 1 oe
CB-5083 conc.	Rep1	Rep2	Rep3	Rep1	Rep2	Rep3
0	27822	31714	27222	27860	21487	26062
100nM CB	30119	28807	26949	26316	25799	26077
200 nM CB	26247	25999	24851	24299	24758	24467
500 nM CB	9954	10649	11341	7684	6245	6229
1000 nM CB	1635	1010	1199	1011	946	1516
