# Supplementary material for: The FAM104 proteins VCF1/2 promote the nuclear localization of p97/VCP
Source: eLife journal article supplement (doi:10.7554/elife.92409), 2023-09-15
Supplement: fig7-figsupp2-data1 [file elife-92409-fig7-figsupp2-data1-v2.zip]

## Sheet: Sheet1
Figure 7 - figure supplement 2
	VCF1 iso1/2					VCF1 iso2
	Control	VCF1 KO	VCF1/2 KO			Control	VCF1 KO	VCF1/2 KO
Rep1	1	0.74	0.678		Rep1	1	0.655	0.588
Rep2	1	0.66443	0.778523		Rep2	1	0.531519	0.740688
Average	1	0.702215	0.728262		Average	1	0.593259	0.664344
SD	0	0.0534364	0.0710808		SD	0	0.0873145	0.107966
