# Supplementary material for: The FAM104 proteins VCF1/2 promote the nuclear localization of p97/VCP
Source: eLife. 2023 Sep 15;12:e92409. doi: 10.7554/eLife.92409 (PMC10541173; doi:10.7554/eLife.92409)
Supplement: Supplementary file 1. [file elife-92409-supp1.xlsx]

## Sheet: Summary of all FAM104 hits
hit ID	DNA sequence of insert	gene ID	protein	isoform(s)	NCBI RefSeq ID(s)	N-terminal residue number(s)
176	ATGGAAGGGAGTACAATTAGGAAAAGGAGAAGGAATGGCAACGAAGAAGACAACCATCTTCCCCCCCAGACCAAAAGAAGTAG-CAGAAACCCTGTCTTTCAGGATTCCTGGGACACAGA-GACAGTACCTGTAATGAGAAACAGTAAAGAAAACAGACTAAGAGGAAACAAAGCGTTCTGCGCGTCTTCAGGCAGTGACAGTGGTGGGAGCAGCAGCAGCAGCAGCAGCAGCATCAATAGCCCGGACAGGGCCAGCGGGCCGGAAGGCAGCTTGAGCCAGACCATGGCCGGATCCAGCCCTAACACGCCTCAGCCCGTGCCCGAGCAGTCCGCGCTGTGCCAAGGCCTCTACTTCCACATCAACCAGACCCTGAGGGAGGCCCACTTCCACAGCCTAC…	84923	VCF1 (FAM104A)	5	NP_001276341.1	1
14	ATGGAAGGGAGTACAATTAGGAAAAGGAGAAGGAATGGCAACGAAGAAGACAACCATCTTCCCCCCCAGACCAAAAGAAGTAG-CAGAAACCCTGTCTTTCAGGATTCCTGGGACACAGA-GACAGTACCTGTAATGAGAAACAGTAAAGAAAACAGACTAAGAGGAAACAAAGCGTTCTGCGCGTCTTCAGGCAGTGACAGTGGTGGGAGCAGCAGCAGCAGCAGCAGCAGCATCAATAGCCCGGACAGGGCCAGCGGGCCGGAAGGCAGCTTGAGCCAGACCATGGCCGGATCCAGCCCTAACACGCCTCAGCCCGTGCCCGAGCAGTCCGCGCTGTGCCAAGGCCTCTACTTCCACATCAACCAGACCCTGAGGGAGGCCCACTTCCACAGCCTAC…	84923	VCF1 (FAM104A)	5	NP_001276341.1	1
22	ATGGAAGGGAGTACAATTAGGAAAAGGAGAAGGAATGGCAACGAAGAAGACAACCATCTTCCCCCCCAGACCAAAAGAAGTAG-CAGAAACCCTGTCTTTCAGGATTCCTGGGACACAGA-GACAGTACCTGTAATGAGAAACAGTAAAGAAAACAGACTAAGAGGAAACAAAGCGTTCTGCGCGTCTTCAGGCAGTGACAGTGGTGGGAGCAGCAGCAGCAGCAGCAGCAGCATCAATAGCCCGGACAGGGCCAGCGGGCCGGAAGGCAGCTTGAGCCAGACCATGGCCGGATCCAGCCCTAACACGCCTCAGCCCGTGCCCGAGCAGTCCGCGCTGTGCCAAGGCCTCTACTTCCACATCAACCAGACCCTGAGGGAGGCCCACTTCCACAGCCTAC…	84923	VCF1 (FAM104A)	5	NP_001276341.1	1
23	ATGGAAGGGAGTACAATTAGGAAAAGGAGAAGGAATGGCAACGAAGAAGACAACCATCTTCCCCCCCAGACCAAAAGAAGTAG-CAGAAACCCTGTCTTTCAGGATTCCTGGGACACAGA-GACAGTACCTGTAATGAGAAACAGTAAAGAAAACAGACTAAGAGGAAACAAAGCGTTCTGCGCGTCTTCAGGCAGTGACAGTGGTGGGAGCAGCAGCAGCAGCAGCAGCAGCATCAATAGCCCGGACAGGGCCAGCGGGCCGGAAGGCAGCTTGAGCCAGACCATGGCCGGATCCAGCCCTAACACGCCTCAGCCCGTGCCCGAGCAGTCCGCGCTGTGCCAAGGCCTCTACTTCCACATCAACCAGACCCTGAGGGAGGCCCACTTCCACAGCCTAC…	84923	VCF1 (FAM104A)	5	NP_001276341.1	1
40	ATGGAAGGGAGTACAATTAGGAAAAGGAGAAGGAATGGCAACGAAGAAGACAACCATCTTCCCCCCCAGACCAAAAGAAGTAG-CAGAAACCCTGTCTTTCAGGATTCCTGGGACACAGA-GACAGTACCTGTAATGAGAAACAGTAAAGAAAACAGACTAAGAGGAAACAAAGCGTTCTGCGCGTCTTCAGGCAGTGACAGTGGTGGGAGCAGCAGCAGCAGCAGCAGCAGCATCAATAGCCCGGACAGGGCCAGCGGGCCGGAAGGCAGCTTGAGCCAGACCATGGCCGGATCCAGCCCTAACACGCCTCAGCCCGTGCCCGAGCAGTCCGCGCTGTGCCAAGGCCTCTACTTCCACATCAACCAGACCCTGAGGGAGGCCCACTTCCACAGCCTAC…	84923	VCF1 (FAM104A)	5	NP_001276341.1	1
79	ATGGAAGGGAGTACAATTAGGAAAAGGAGAAGGAATGGCAACGAAGAAGACAACCATCTTCCCCCCCAGACCAAAAGAAGTAG-CAGAAACCCTGTCTTTCAGGATTCCTGGGACACAGA-GACAGTACCTGTAATGAGAAACAGTAAAGAAAACAGACTAAGAGGAAACAAAGCGTTCTGCGCGTCTTCAGGCAGTGACAGTGGTGGGAGCAGCAGCAGCAGCAGCAGCAGCATCAATAGCCCGGACAGGGCCAGCGGGCCGGAAGGCAGCTTGAGCCAGACCATGGCCGGATCCAGCCCTAACACGCCTCAGCCCGTGCCCGAGCAGTCCGCGCTGTGCCAAGGCCTCTACTTCCACATCAACCAGACCCTGAGGGAGGCCCACTTCCACAGCCTAC…	84923	VCF1 (FAM104A)	5	NP_001276341.1	1
128	ATGGAAGGGAGTACAATTAGGAAAAGGAGAAGGAATGGCAACGAAGAAGACAACCATCTTCCCCCCCAGACCAAAAGAAGTAG-CAGAAACCCTGTCTTTCAGGATTCCTGGGACACAGA-GACAGTACCTGTAATGAGAAACAGTAAAGAAAACAGACTAAGAGGAAACAAAGCGTTCTGCGCGTCTTCAGGCAGTGACAGTGGTGGGAGCAGCAGCAGCAGCAGCAGCAGCATCAATAGCCCGGACAGGGCCAGCGGGCCGGAAGGCAGCTTGAGCCAGACCATGGCCGGATCCAGCCCTAACACGCCTCAGCCCGTGCCCGAGCAGTCCGCGCTGTGCCAAGGCCTCTACTTCCACATCAACCAGACCCTGAGGGAGGCCCACTTCCACAGCCTAC…	84923	VCF1 (FAM104A)	5	NP_001276341.1	1
176	ATGGAAGGGAGTACAATTAGGAAAAGGAGAAGGAATGGCAACGAAGAAGACAACCATCTTCCCCCCCAGACCAAAAGAAGTAG-CAGAAACCCTGTCTTTCAGGATTCCTGGGACACAGA-GACAGTACCTGTAATGAGAAACAGTAAAGAAAACAGACTAAGAGGAAACAAAGCGTTCTGCGCGTCTTCAGGCAGTGACAGTGGTGGGAGCAGCAGCAGCAGCAGCAGCAGCATCAATAGCCCGGACAGGGCCAGCGGGCCGGAAGGCAGCTTGAGCCAGACCATGGCCGGATCCAGCCCTAACACGCCTCAGCCCGTGCCCGAGCAGTCCGCGCTGTGCCAAGGCCTCTACTTCCACATCAACCAGACCCTGAGGGAGGCCCACTTCCACAGCCTAC…	84923	VCF1 (FAM104A)	5	NP_001276341.1	1
242	ATGGAAGGGAGTACAATTAGGAAAAGGAGAAGGAATGGCAACGAAGAAGACAACCATCTTCCCCCCCAGACCAAAAGAAGTAG-CAGAAACCCTGTCTTTCAGGATTCCTGGGACACAGA-GACAGTACCTGTAATGAGAAACAGTAAAGAAAACAGACTAAGAGGAAACAAAGCGTTCTGCGCGTCTTCAGGCAGTGACAGTGGTGGGAGCAGCAGCAGCAGCAGCAGCAGCATCAATAGCCCGGACAGGGCCAGCGGGCCGGAAGGCAGCTTGAGCCAGACCATGGCCGGATCCAGCCCTAACACGCCTCAGCCCGTGCCCGAGCAGTCCGCGCTGTGCCAAGGCCTCTACTTCCACATCAACCAGACCCTGAGGGAGGCCCACTTCCACAGCCTAC…	84923	VCF1 (FAM104A)	5	NP_001276341.1	1
276	ATGGAAGGGAGTACAATTAGGAAAAGGAGAAGGAATGGCAACGAAGAAGACAACCATCTTCCCCCCCAGACCAAAAGAAGTAG-CAGAAACCCTGTCTTTCAGGATTCCTGGGACACAGA-GACAGTACCTGTAATGAGAAACAGTAAAGAAAACAGACTAAGAGGAAACAAAGCGTTCTGCGCGTCTTCAGGCAGTGACAGTGGTGGGAGCAGCAGCAGCAGCAGCAGCAGCATCAATAGCCCGGACAGGGCCAGCGGGCCGGAAGGCAGCTTGAGCCAGACCATGGCCGGATCCAGCCCTAACACGCCTCAGCCCGTGCCCGAGCAGTCCGCGCTGTGCCAAGGCCTCTACTTCCACATCAACCAGACCCTGAGGGAGGCCCACTTCCACAGCCTAC…	84923	VCF1 (FAM104A)	5	NP_001276341.1	1
324	ATGGAAGGGAGTACAATTAGGAAAAGGAGAAGGAATGGCAACGAAGAAGACAACCATCTTCCCCCCCAGACCAAAAGAAGTAG-CAGAAACCCTGTCTTTCAGGATTCCTGGGACACAGA-GACAGTACCTGTAATGAGAAACAGTAAAGAAAACAGACTAAGAGGAAACAAAGCGTTCTGCGCGTCTTCAGGCAGTGACAGTGGTGGGAGCAGCAGCAGCAGCAGCAGCAGCATCAATAGCCCGGACAGGGCCAGCGGGCCGGAAGGCAGCTTGAGCCAGACCATGGCCGGATCCAGCCCTAACACGCCTCAGCCCGTGCCCGAGCAGTCCGCGCTGTGCCAAGGCCTCTACTTCCACATCAACCAGACCCTGAGGGAGGCCCACTTCCACAGCCTAC…	84923	VCF1 (FAM104A)	5	NP_001276341.1	1
503	ATGGAAGGGAGTACAATTAGGAAAAGGAGAAGGAATGGCAACGAAGAAGACAACCATCTTCCCCCCCAGACCAAAAGAAGTAG-CAGAAACCCTGTCTTTCAGGATTCCTGGGACACAGA-GACAGTACCTGTAATGAGAAACAGTAAAGAAAACAGACTAAGAGGAAACAAAGCGTTCTGCGCGTCTTCAGGCAGTGACAGTGGTGGGAGCAGCAGCAGCAGCAGCAGCAGCATCAATAGCCCGGACAGGGCCAGCGGGCCGGAAGGCAGCTTGAGCCAGACCATGGCCGGATCCAGCCCTAACACGCCTCAGCCCGTGCCCGAGCAGTCCGCGCTGTGCCAAGGCCTCTACTTCCACATCAACCAGACCCTGAGGGAGGCCCACTTCCACAGCCTAC…	84923	VCF1 (FAM104A)	5	NP_001276341.1	1
586	ATGGAAGGGAGTACAATTAGGAAAAGGAGAAGGAATGGCAACGAAGAAGACAACCATCTTCCCCCCCAGACCAAAAGAAGTAG-CAGAAACCCTGTCTTTCAGGATTCCTGGGACACAGA-GACAGTACCTGTAATGAGAAACAGTAAAGAAAACAGACTAAGAGGAAACAAAGCGTTCTGCGCGTCTTCAGGCAGTGACAGTGGTGGGAGCAGCAGCAGCAGCAGCAGCAGCATCAATAGCCCGGACAGGGCCAGCGGGCCGGAAGGCAGCTTGAGCCAGACCATGGCCGGATCCAGCCCTAACACGCCTCAGCCCGTGCCCGAGCAGTCCGCGCTGTGCCAAGGCCTCTACTTCCACATCAACCAGACCCTGAGGGAGGCCCACTTCCACAGCCTAC…	84923	VCF1 (FAM104A)	5	NP_001276341.1	1
587	ATGGAAGGGAGTACAATTAGGAAAAGGAGAAGGAATGGCAACGAAGAAGACAACCATCTTCCCCCCCAGACCAAAAGAAGTAG-CAGAAACCCTGTCTTTCAGGATTCCTGGGACACAGA-GACAGTACCTGTAATGAGAAACAGTAAAGAAAACAGACTAAGAGGAAACAAAGCGTTCTGCGCGTCTTCAGGCAGTGACAGTGGTGGGAGCAGCAGCAGCAGCAGCAGCAGCATCAATAGCCCGGACAGGGCCAGCGGGCCGGAAGGCAGCTTGAGCCAGACCATGGCCGGATCCAGCCCTAACACGCCTCAGCCCGTGCCCGAGCAGTCCGCGCTGTGCCAAGGCCTCTACTTCCACATCAACCAGACCCTGAGGGAGGCCCACTTCCACAGCCTAC…	84923	VCF1 (FAM104A)	5	NP_001276341.1	1
631	ATGGAAGGGAGTACAATTAGGAAAAGGAGAAGGAATGGCAACGAAGAAGACAACCATCTTCCCCCCCAGACCAAAAGAAGTAG-CAGAAACCCTGTCTTTCAGGATTCCTGGGACACAGA-GACAGTACCTGTAATGAGAAACAGTAAAGAAAACAGACTAAGAGGAAACAAAGCGTTCTGCGCGTCTTCAGGCAGTGACAGTGGTGGGAGCAGCAGCAGCAGCAGCAGCAGCATCAATAGCCCGGACAGGGCCAGCGGGCCGGAAGGCAGCTTGAGCCAGACCATGGCCGGATCCAGCCCTAACACGCCTCAGCCCGTGCCCGAGCAGTCCGCGCTGTGCCAAGGCCTCTACTTCCACATCAACCAGACCCTGAGGGAGGCCCACTTCCACAGCCTAC…	84923	VCF1 (FAM104A)	5	NP_001276341.1	1
686	ATGGAAGGGAGTACAATTAGGAAAAGGAGAAGGAATGGCAACGAAGAAGACAACCATCTTCCCCCCCAGACCAAAAGAAGTAG-CAGAAACCCTGTCTTTCAGGATTCCTGGGACACAGA-GACAGTACCTGTAATGAGAAACAGTAAAGAAAACAGACTAAGAGGAAACAAAGCGTTCTGCGCGTCTTCAGGCAGTGACAGTGGTGGGAGCAGCAGCAGCAGCAGCAGCAGCATCAATAGCCCGGACAGGGCCAGCGGGCCGGAAGGCAGCTTGAGCCAGACCATGGCCGGATCCAGCCCTAACACGCCTCAGCCCGTGCCCGAGCAGTCCGCGCTGTGCCAAGGCCTCTACTTCCACATCAACCAGACCCTGAGGGAGGCCCACTTCCACAGCCTAC…	84923	VCF1 (FAM104A)	5	NP_001276341.1	1
736	ATGGAAGGGAGTACAATTAGGAAAAGGAGAAGGAATGGCAACGAAGAAGACAACCATCTTCCCCCCCAGACCAAAAGAAGTAG-CAGAAACCCTGTCTTTCAGGATTCCTGGGACACAGA-GACAGTACCTGTAATGAGAAACAGTAAAGAAAACAGACTAAGAGGAAACAAAGCGTTCTGCGCGTCTTCAGGCAGTGACAGTGGTGGGAGCAGCAGCAGCAGCAGCAGCAGCATCAATAGCCCGGACAGGGCCAGCGGGCCGGAAGGCAGCTTGAGCCAGACCATGGCCGGATCCAGCCCTAACACGCCTCAGCCCGTGCCCGAGCAGTCCGCGCTGTGCCAAGGCCTCTACTTCCACATCAACCAGACCCTGAGGGAGGCCCACTTCCACAGCCTAC…	84923	VCF1 (FAM104A)	5	NP_001276341.1	1
250	AAAAGGAGAAGGAATGGCAACGAAGAAGACAACTATCTTCCCCCCCAGACCAAAAGAAGTAG-CAGAAACCCTGTCTTTCAGGATTCCTGGGACACAGA-GACAGTACCTGTAATGAGAAACAGTAAAGAAAACAGACTAAGAGGAAACAAAGCGTTCTGCGCGTCTTCAGGCAGTGACAGTGGTGGGAGCAGCAGCAGCAGCAGCAGCAGCATCAATAGCCCGGACAGGGCCAGCGGGCCGGAAGGCAGCTTGAGCCAGACCATGGCCGGATCCAGCCCTAACACGCCTCAGCCCGTGCCCGAGCAGTCCGCGCTGTGCCAAGGCCTCTACTTCCACATCAACCAGACCCTGAGGGAGGCCCACTTCCACAGCCTACAGCACCGAGGG-CGGCCTCTG…	84923	VCF1 (FAM104A)	1;5	NP_001092302.1; NP_001276341.1	75;8
325	AAAAGGAGAAGGAATGGCAACGAAGAAGACAACTATCTTCCCCCCCAGACCAAAAGAAGTAG-CAGAAACCCTGTCTTTCAGGATTCCTGGGACACAGA-GACAGTACCTGTAATGAGAAACAGTAAAGAAAACAGACTAAGAGGAAACAAAGCGTTCTGCGCGTCTTCAGGCAGTGACAGTGGTGGGAGCAGCAGCAGCAGCAGCAGCAGCATCAATAGCCCGGACAGGGCCAGCGGGCCGGAAGGCAGCTTGAGCCAGACCATGGCCGGATCCAGCCCTAACACGCCTCAGCCCGTGCCCGAGCAGTCCGCGCTGTGCCAAGGCCTCTACTTCCACATCAACCAGACCCTGAGGGAGGCCCACTTCCACAGCCTACAGCACCGAGGG-CGGCCTCTG…	84923	VCF1 (FAM104A)	1;5	NP_001092302.1; NP_001276341.1	75;8
561	AAAAGAAGTAGCAGAAACCCTGTCTTTCAGGATTCCTGGGACACAGA-GACAGTACCTGTAATGAGAAACAGTAAAGAAAACAGACTAAGAGGAAACAAAGCGTTCTGCGCGTCTTCAGGCAGTGACAGTGGTGGGAGCAGCAGCAGCAGCAGCAGCAGCATCAACAGCCCGGACAGGGCCAGCGGGCCGGAAGGCAGCTTGAGCCAGACCATGGCCGGATCCAGCCCTAACACGCCTCAGCCCGTGCCCGAGCAGTCCGCGCTGTGCCAAGGCCTCTACTTCCACATCAACCAGACCCTGAGGGAGGCCCACTTCCACAGCCTACAGCACCGAGGG-CGGCCTCTGACATGAT	84923	VCF1 (FAM104A)	1;5	NP_001092302.1; NP_001276341.1	92;25
191	AGAAACCCTGTCTTTCAGGATTCCTGGGACACAGA-GACAGTACCTGTAATGAGAAACAGTAAAGAAAACAGACTAAGAGGAAACAAAGCGTTCTGCGCGTCTTCAGGCAGTGACAGTGGTGGGAGCAGCAGCAGCAGCAGCAGCAGCATCAACAGCCCGGACAGGGCCAGCGGGCCGGAAGGCAGCTTGAGCCAGACCATGGCCGGATCCAGCCCTAACACGCCTCAGCCCGTGCCCGAGCAGTCCGCGCTGTGCCAAGGCCTCTACTTCCACATCAACCAGACCCTGAGGGAGGCCCACTTCCACAGCCTACAGCACCGAGGG-CGGCCTCTGACATGA	84923	VCF1 (FAM104A)	1;5	NP_001092302.1; NP_001276341.1	96;29
694	GTACCTGTAATGAGAAACAGTAAAGAAAACAGACTAAGAGGAAACAAAGCGTTCTGCGCGTCTTCAGGCAGTGACAGTGGTGGGAGCAGCAGCAGCAGCAGCAGCAGCATCAATAGCCCGGACAGGGCCAGCGGGCCGGAAGGCAGCTTGAGCCAGACCATGGCCGGATCCAGCCCTAACACGCCTCAGCCCGTGCCCGAGCAGTCCGCGCTGTGCCAAGGCCTCTACTTCCACATCAACCAGACCCTGAGGGAGGCCCACTTCCACAGCCTACAGCACCGAGGG-CGGCCTCTGACATGA	84923	VCF1 (FAM104A)	1;5	NP_001092302.1; NP_001276341.1	109;42
61	GTAATGAGAAACAGTAAAGAAAACAGACTAAGAGGAAACAAAGCGTTCTGCGCGTCTTCAGGCAGTGACAGTGGTGGGAGCAGCAGCAGCAGCAGCAGCAGCATCAACAGCCCGGACAGGGCCAGCGGGCCGGAAGGCAGCTTGAGCCAGACCATGGCCGGATCCAGCCCTAACACGCCTCGGCCCGTGCCCGAGCAGTCCGCGCTGTGCCAAGGCCTCTACTTCCACATCAACCAGACCCTGAGGGAGGCCCACTTCCACAGCCTACAGCACCGAGGG-CGGCCTCTGA	84923	VCF1 (FAM104A)	1;5	NP_001092302.1; NP_001276341.1	111;44
256	GTAATGAGAAACAGTAAAGAAAACAGACTAAGAGGAAACAAAGCGTTCTGCGCGTCTTCAGGCAGTGACAGTGGTGGGAGCAGCAGCAGCAGCAGCAGCAGCATCAACAGCCCGGACAGGGCCAGCGGGCCGGAAGGCAGCTTGAGCCAGACCATGGCCGGATCCAGCCCTAACACGCCTCGGCCCGTGCCCGAGCAGTCCGCGCTGTGCCAAGGCCTCTACTTCCACATCAACCAGACCCTGAGGGAGGCCCACTTCCACAGCCTACAGCACCGAGGG-CGGCCTCTGA	84923	VCF1 (FAM104A)	1;5	NP_001092302.1; NP_001276341.1	111;44
452	GTAATGAGAAACAGTAAAGAAAACAGACTAAGAGGAAACAAAGCGTTCTGCGCGTCTTCAGGCAGTGACAGTGGTGGGAGCAGCAGCAGCAGCAGCAGCAGCATCAACAGCCCGGACAGGGCCAGCGGGCCGGAAGGCAGCTTGAGCCAGACCATGGCCGGATCCAGCCCTAACACGCCTCGGCCCGTGCCCGAGCAGTCCGCGCTGTGCCAAGGCCTCTACTTCCACATCAACCAGACCCTGAGGGAGGCCCACTTCCACAGCCTACAGCACCGAGGG-CGGCCTCTGA	84923	VCF1 (FAM104A)	1;5	NP_001092302.1; NP_001276341.1	111;44
585	GTAATGAGAAACAGTAAAGAAAACAGACTAAGAGGAAACAAAGCGTTCTGCGCGTCTTCAGGCAGTGACAGTGGTGGGAGCAGCAGCAGCAGCAGCAGCAGCATCAACAGCCCGGACAGGGCCAGCGGGCCGGAAGGCAGCTTGAGCCAGACCATGGCCGGATCCAGCCCTAACACGCCTCGGCCCGTGCCCGAGCAGTCCGCGCTGTGCCAAGGCCTCTACTTCCACATCAACCAGACCCTGAGGGAGGCCCACTTCCACAGCCTACAGCACCGAGGG-CGGCCTCTGA	84923	VCF1 (FAM104A)	1;5	NP_001092302.1; NP_001276341.1	111;44
8	GGCAGTGACAGTGGTGGGAGCAGCAGCAGCAGCAGCAGCAGCATCAATAGCCCGGACAGGGCCAGCGGGCCGGAAGGCAGCTTGAGCCAGACCATGGCCGGATCCAGCCCTAACACGCCTCAGCCCGTGCCCGAGCAGTCCGCGCTGTGCCAAGGCCTCTACTTCCACATCAACCAGACCCTGAGGGAGGCCCACTTCCACAGCCTACAGCACCGAGGG-CGGCCTCTGACATGA	84923	VCF1 (FAM104A)	1;2;5	NP_001092302.1;NP_116226.2;NP_001276341.1	131;110;64
173	GTCTTTCAGGATTCCTGGGACACAGAGTCTTCAGGCAGTGACAGTGGTGGGAGCAGCAGCAGCAGCAGCAGCAGCATCAACAGCCCGGACAGGGCCAGCGGGCCGGAAGGCAGCTTGAGCCAGACCATGGCCGGATCCAGCCCTAACACGCCTCAGCCCGTGCCCGAGCAGTCCGCGCTGTGCCAAGGCCTCTACTTCCACATCAACCAGACCCTGAGGGAGGCCCACTTCCACAGCCTACAGCACCGAGGGCGGCCTCTGACATGA	84923	VCF1 (FAM104A)	2	NP_116226.2	99
144	GCGGCTGCGAGAGCCAAGGCCCGAGGGGGTGGGCGTGGCGGCCGCCGAAACACAACCCCCTCTGTTCCCTCTCTTCGCGGAGCGGCGCCGCGTAGCTTCCATCCGCCAGCTGCCATGAGCGAGCGCCTCCGTCCCAGGAAAAGGAGAAGGAATGGCAACGAAGAAGACAACCATCTTCCCCCCCAGACCAAAAGAAGTAGCAGAAACCCTGTCTTTCAGGATTCCTGGGACACAGAGACAGTACCTGTAATGAGAAACAGTAAAGAAAACAGACTAAGAGGAAACAAAGCGTTCTGCGCGTCTTCAGGCAGTGACAGTGGTGGGAGCAGCAGCAGCAGCAGCAGCAGCATCAATAGCCCGGACAGGGCCAGCGGGCCGGAAGGCAGCTTGAGCCAGACC…	84923	VCF1 (FAM104A)	1	NP_001092302.1	29
299	GCGGCTGCGAGAGCCAAGGCCCGAGGGGGTGGGCGTGGCGGCCGCCGAAACACAACCCCCTCTGTTCCCTCTCTTCGCGGAGCGGCGCCGCGTAGCTTCCATCCGCCAGCTGCCATGAGCGAGCGCCTCCGTCCCAGGAAAAGGAGAAGGAATGGCAACGAAGAAGACAACCATCTTCCCCCCCAGACCAAAAGAAGTAGCAGAAACCCTGTCTTTCAGGATTCCTGGGACACAGAGACAGTACCTGTAATGAGAAACAGTAAAGAAAACAGACTAAGAGGAAACAAAGCGTTCTGCGCGTCTTCAGGCAGTGACAGTGGTGGGAGCAGCAGCAGCAGCAGCAGCAGCATCAATAGCCCGGACAGGGCCAGCGGGCCGGAAGGCAGCTTGAGCCAGACC…	84923	VCF1 (FAM104A)	1	NP_001092302.1	29
620	GCGGCTGCGAGAGCCAAGGCCCGAGGGGGTGGGCGTGGCGGCCGCCGAAACACAACCCCCTCTGTTCCCTCTCTTCGCGGAGCGGCGCCGCGTAGCTTCCATCCGCCAGCTGCCATGAGCGAGCGCCTCCGTCCCAGGAAAAGGAGAAGGAATGGCAACGAAGAAGACAACCATCTTCCCCCCCAGACCAAAAGAAGTAGCAGAAACCCTGTCTTTCAGGATTCCTGGGACACAGAGACAGTACCTGTAATGAGAAACAGTAAAGAAAACAGACTAAGAGGAAACAAAGCGTTCTGCGCGTCTTCAGGCAGTGACAGTGGTGGGAGCAGCAGCAGCAGCAGCAGCAGCATCAATAGCCCGGACAGGGCCAGCGGGCCGGAAGGCAGCTTGAGCCAGACC…	84923	VCF1 (FAM104A)	1	NP_001092302.1	29
744	AGAGCCAAGGCCCGAGGGGGTGGGCGTGGCGGCCGCCGAAACACAACCCCCTCTGTTCCCTCTCTTCGCGGAGCGGCGCCGCGTAGCTTCCATCCGCCAGCTGCCATGAGCGAGCGCCTCCGTCCCAGGAAAAGGAGAAGGAATGGCAACGAAGAAGACAACCATCTTCCCCCCCAGACCAAAAGAAGTAGCAGAAACCCTGTCTTTCAGGATTCCTGGGACACAGAGACAGTACCTGTAATGAGAAACAGTAAAGAAAACAGACTAAGAGGAAACAAAGCGTTCTGCGCGTCTTCAGGCAGTGACAGTGGTGGGAGCAGCAGCAGCAGCAGCAGCAGCATCAATAGCCCGGACAGGGCCAGCGGGCCGGAAGGCAGCTTGAGCCAGACCATGGCCGGA…	84923	VCF1 (FAM104A)	1	NP_001092302.1	32
619	CCGCGTAGCTTCCATCCGCCAGCTGCCATGAGCGAGCGCCTCCGTCCCAGGAAAAGGAGAAGGAATGGCAACGAAGAAGACAACCATCTTCCCCCCCAGACCAAAAGAAGTAGCAGAAACCCTGTCTTTCAGGATTCCTGGGACACAGAGACAGTACCTGTAATGAGAAACAGTAAAGAAAACAGACTAAGAGGAAACAAAGCGTTCTGCGCGTCTTCAGGCAGTGACAGTGGTGGGAGCAGCAGCAGCAGCAGCAGCAGCATCAATAGCCCGGACAGGGCCAGCGGGCCGGAAGGCAGCTTGAGCCAGACCATGGCCGGATCCAGCCCTAACACGCCTCAGCCCGTGCCCGAGCAGTCCGCGCTGTGCCAAGGCCTCTACTTCCACATCAACCAGACC…	84923	VCF1 (FAM104A)	1	NP_001092302.1	58
24	ATGGGAGGCTGCCCTGTACGGAAAAGAAGAAGAAATGGCAGTAAAGAGGGCAACCATCATTCCACCCAGCCCAAAAGGAATAAGAGAAACCCTATCTTTCAGGATTCTCAAGATACAGAGGTATTTTCATGGAGTGATAATGAAAGGAGCAGCAGCCGCATTAATATCCCAGAGAGAGCAAGTGGACCAGAAGGCAACTTAAACCAGATTGTTACTGAACCCGATGCAAACTTTCCCCAGTTCTTGCATGAGGGGTATGTACCATGCCAAGGTCTTTACTCCCATATCAACCAGACCTTGAAGGAGGCTCACTTCAACAGCCTGCAGCAGCGAGGGCAAGCTCCAACATGA	90736	VCF2 (FAM104B)	3	NP_001160172.1	1
47	AGAAATGGCAGTAAAGAGGGCAACCATCATTCCACCCAGCCCAAAAGGAATAAGAGAAACCCTATCTTTCAGGATTCTCAAGATACAGAGGTATTTTCATGGAGTGATAATGAAAGGAGCAGCAGCCGCATTAATATCCCAGAGAGAGCAAGTGGACCAGAAGGCAACTTAAACCAGATTGTTACTGAACCCGATGCAAACTTTCCCCAGTTCTTGCATGAGGGGTATGTACCATGCCAAGGTCTTTACTCCCATATCAACCAGACCTTGAAGGAGGCTCACTTCAACAGCCTGCAGCAGCGAGGGCAAGCTCCAACATGA	90736	VCF2 (FAM104B)	3	NP_001160172.1	11
481	AGAAATGGCAGTAAAGAGGGCAACCATCATTCCACCCAGCCCAAAAGGAATAAGAGAAACCCTATCTTTCAGGATTCTCAAGATACAGAGGTATTTTCATGGAGTGATAATGAAAGGAGCAGCAGCCGCATTAATATCCCAGAGAGAGCAAGTGGACCAGAAGGCAACTTAAACCAGATTGTTACTGAACCCGATGCAAACTTTCCCCAGTTCTTGCATGAGGGGTATGTACCATGCCAAGGTCTTTACTCCCATATCAACCAGACCTTGAAGGAGGCTCACTTCAACAGCCTGCAGCAGCGAGGGCAAGCTCCAACATGA	90736	VCF2 (FAM104B)	3	NP_001160172.1	11
672	AGAAATGGCAGTAAAGAGGGCAACCATCATTCCACCCAGCCCAAAAGGAATAAGAGAAACCCTATCTTTCAGGATTCTCAAGATACAGAGGTATTTTCATGGAGTGATAATGAAAGGAGCAGCAGCCGCATTAATATCCCAGAGAGAGCAAGTGGACCAGAAGGCAACTTAAACCAGATTGTTACTGAACCCGATGCAAACTTTCCCCAGTTCTTGCATGAGGGGTATGTACCATGCCAAGGTCTTTACTCCCATATCAACCAGACCTTGAAGGAGGCTCACTTCAACAGCCTGCAGCAGCGAGGGCAAGCTCCAACATGA	90736	VCF2 (FAM104B)	3	NP_001160172.1	11
289	CGGAAAAGAAGAAGAAATGGCAGTAAAGAGGGCAACCATCATTCCACCCAGCCCAAAAGGAATAAGAGAAACCCTATCTTTCAGGATTCTCAAGATACAGAG---TTTTCATGGAGTGATAATGAAAGGAGCAGCAGCCGCATTAATATCCCAGAGAGAGCAAGTGGACCAGAAGGCAACTTAAACCAGATTGTTACTGAACCCGATGCAAACTTTCCCCAGTTCTTGCATGAGGGGTATGTACCATGCCAAGGTCTTTACTCCCATATCAACCAGACCTTGAAGGAGGCTCACTTCAACAGCCTGCAGCAGCGAGGGCAAGCTCCAACATGA	90736	VCF2 (FAM104B)	4;5	NP_001160173.1; NP_001160174.1	7;4
510	CGGAAAAGAAGAAGAAATGGCAGTAAAGAGGGCAACCATCATTCCACCCAGCCCAAAAGGAATAAGAGAAACCCTATCTTTCAGGATTCTCAAGATACAGAG---TTTTCATGGAGTGATAATGAAAGGAGCAGCAGCCGCATTAATATCCCAGAGAGAGCAAGTGGACCAGAAGGCAACTTAAACCAGATTGTTACTGAACCCGATGCAAACTTTCCCCAGTTCTTGCATGAGGGGTATGTACCATGCCAAGGTCTTTACTCCCATATCAACCAGACCTTGAAGGAGGCTCACTTCAACAGCCTGCAGCAGCGAGGGCAAGCTCCAACATGA	90736	VCF2 (FAM104B)	4;5	NP_001160173.1; NP_001160174.1	7;4
209	AGAAGAAATGGCAGTAAAGAGGGCAACCATCATTCCACCCAGCCCAAAAGGAATAAGAGAAACCCTATCTTTCAGGATTCTCAAGATACAGAG---TTTTCATGGAGTGATAATGAAAGGAGCAGCAGCCGCATTAATATCCCAGAGAGAGCAAGTGGACCAGAAGGCAACTTAAACCAGATTGTTACTGAACCCGATGCAAACTTTCCCCAGTTCTTGCATGAGGGGTATGTACCATGCCAAGGTCTTTACTCCCATATCAACCAGACCTTGAAGGAGGCTCACTTCAACAGCCTGCAGCAGCGAGGGCAAGCTCCAACATGA	90736	VCF2 (FAM104B)	4;5;6	NP_001160173.1; NP_001160174.1; NP_001160175.1	9;6;8
