# Supplementary figures and images for: The FAM104 proteins VCF1/2 promote the nuclear localization of p97/VCP
Source: eLife journal article supplement (doi:10.7554/elife.92409), 2023-09-15

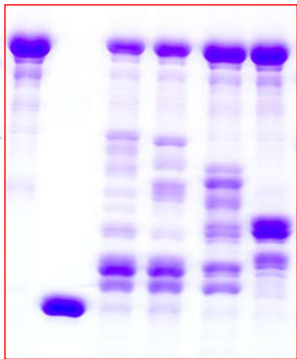

Supplement: fig1-data1 [file elife-92409-fig1-data1-v2.zip]

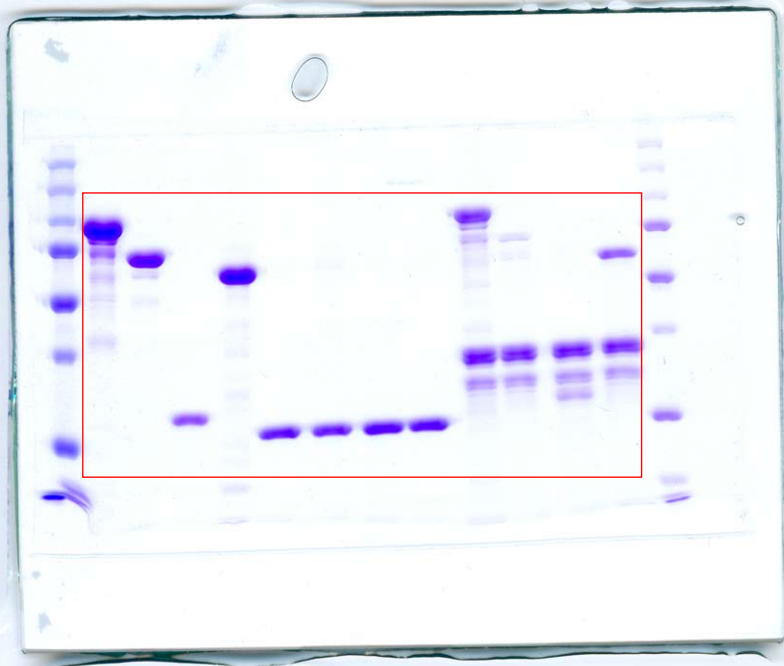

Supplement: fig1-data1 [file elife-92409-fig1-data1-v2.zip]

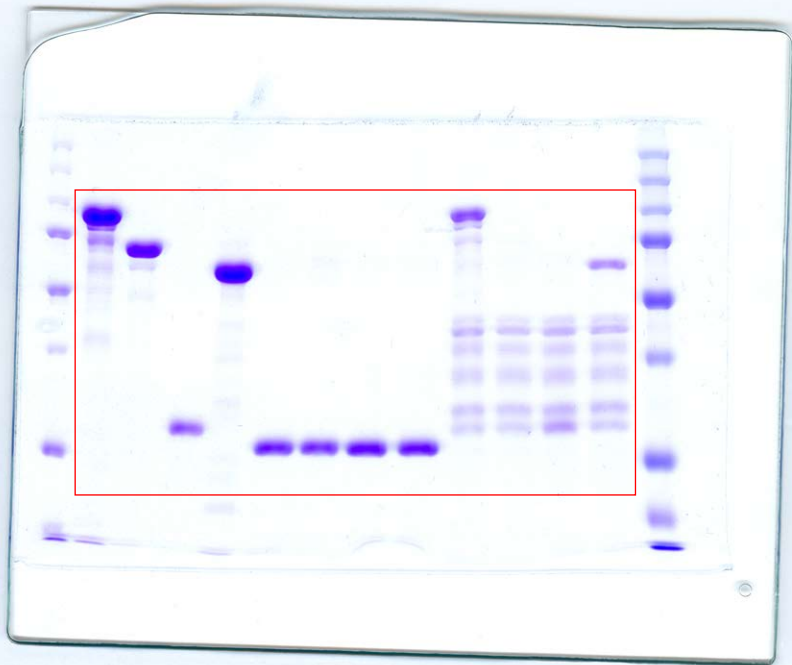

Supplement: fig1-data1 [file elife-92409-fig1-data1-v2.zip]

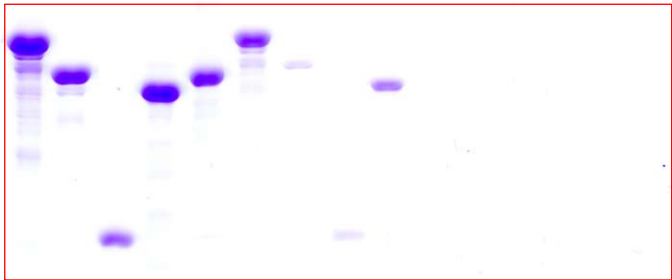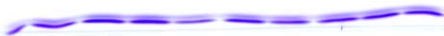

Supplement: fig2-data2 [file elife-92409-fig2-data2-v2.zip]

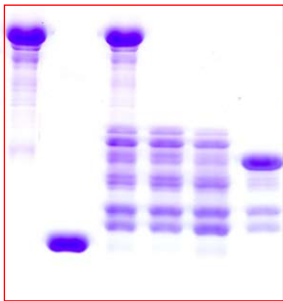

Supplement: fig2-data2 [file elife-92409-fig2-data2-v2.zip]

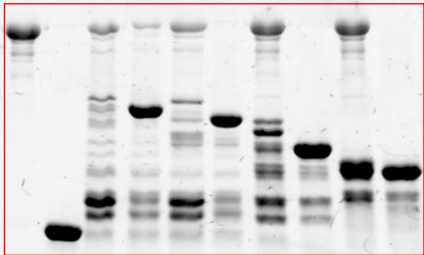

Supplement: fig2-data2 [file elife-92409-fig2-data2-v2.zip]

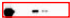

Supplement: fig3-data3 [file elife-92409-fig3-data3-v2.zip]

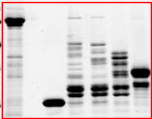

Supplement: fig3-data3 [file elife-92409-fig3-data3-v2.zip]

100

100

100

100

100

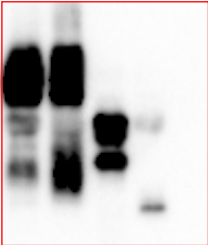

Supplement: fig3-figsupp1-data1 [file elife-92409-fig3-figsupp1-data1-v2.zip]

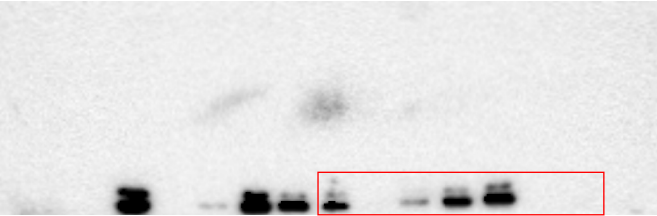

Supplement: fig3-figsupp1-data1 [file elife-92409-fig3-figsupp1-data1-v2.zip]

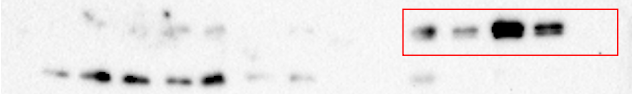

Supplement: fig3-figsupp1-data1 [file elife-92409-fig3-figsupp1-data1-v2.zip]

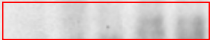

Supplement: fig3-figsupp1-data1 [file elife-92409-fig3-figsupp1-data1-v2.zip]

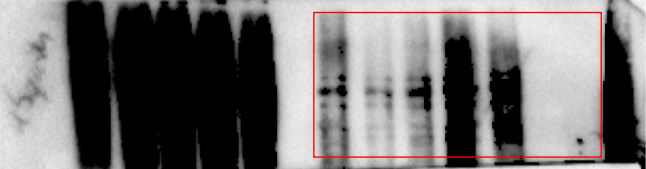

Supplement: fig3-figsupp1-data1 [file elife-92409-fig3-figsupp1-data1-v2.zip]

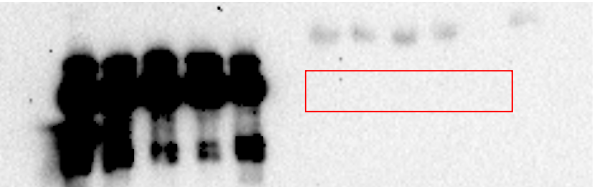

Supplement: fig3-figsupp1-data1 [file elife-92409-fig3-figsupp1-data1-v2.zip]

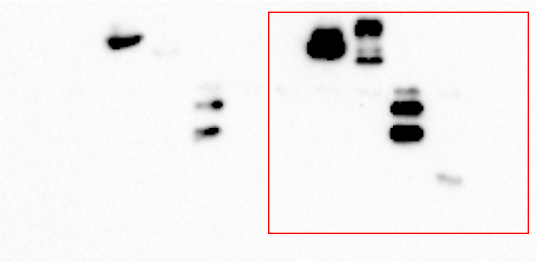

Supplement: fig3-figsupp1-data1 [file elife-92409-fig3-figsupp1-data1-v2.zip]

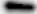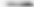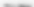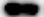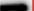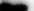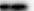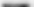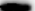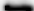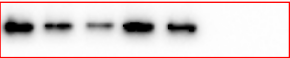

Supplement: fig3-figsupp1-data1 [file elife-92409-fig3-figsupp1-data1-v2.zip]

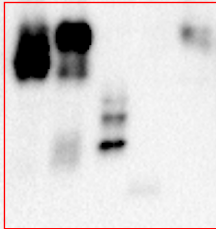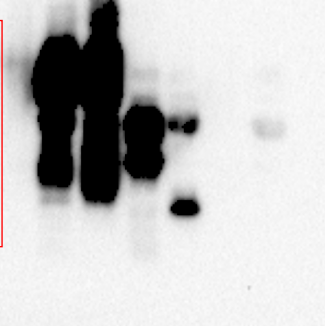

Supplement: fig3-figsupp1-data1 [file elife-92409-fig3-figsupp1-data1-v2.zip]

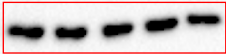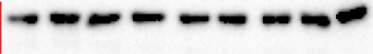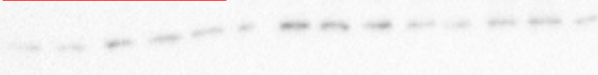

Supplement: fig3-figsupp1-data1 [file elife-92409-fig3-figsupp1-data1-v2.zip]

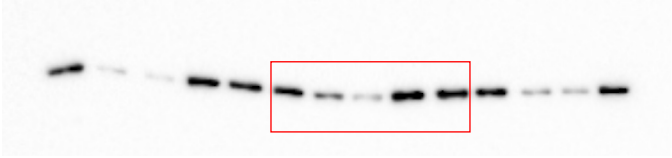

Supplement: fig3-figsupp1-data1 [file elife-92409-fig3-figsupp1-data1-v2.zip]

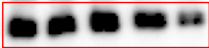

Supplement: fig3-figsupp1-data1 [file elife-92409-fig3-figsupp1-data1-v2.zip]

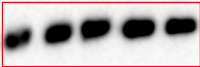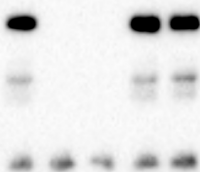

Supplement: fig3-figsupp1-data1 [file elife-92409-fig3-figsupp1-data1-v2.zip]

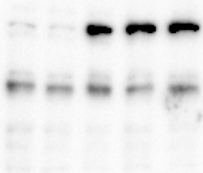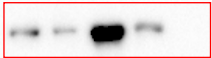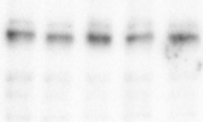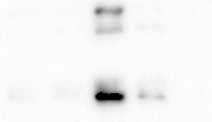

Supplement: fig3-figsupp1-data1 [file elife-92409-fig3-figsupp1-data1-v2.zip]

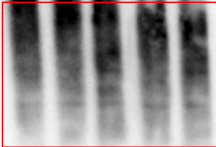

Supplement: fig3-figsupp1-data1 [file elife-92409-fig3-figsupp1-data1-v2.zip]

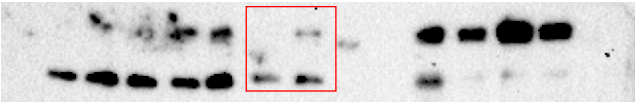

Supplement: fig3-figsupp1-data1 [file elife-92409-fig3-figsupp1-data1-v2.zip]

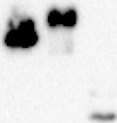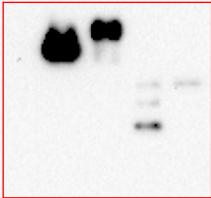

Supplement: fig3-figsupp1-data1 [file elife-92409-fig3-figsupp1-data1-v2.zip]

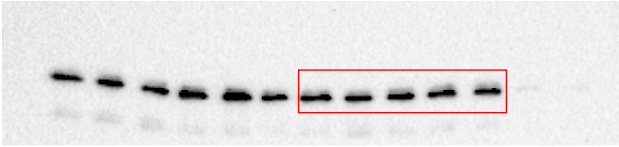

Supplement: fig3-figsupp1-data1 [file elife-92409-fig3-figsupp1-data1-v2.zip]

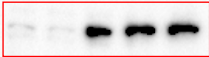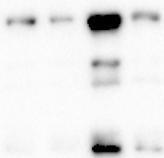

Supplement: fig3-figsupp1-data1 [file elife-92409-fig3-figsupp1-data1-v2.zip]

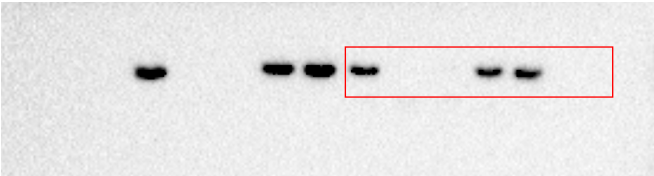

Supplement: fig3-figsupp1-data1 [file elife-92409-fig3-figsupp1-data1-v2.zip]

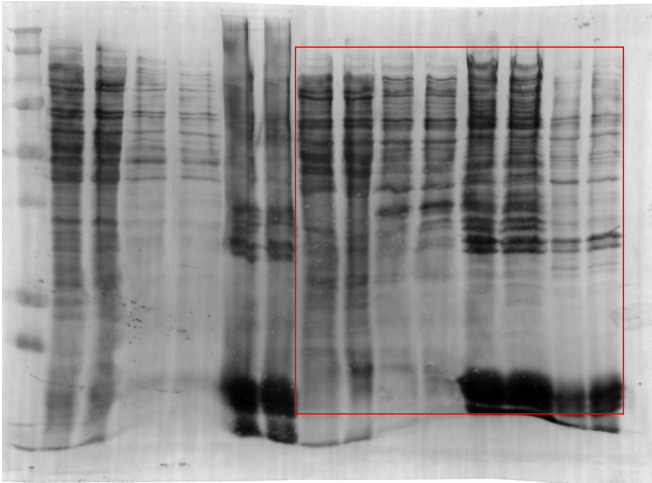

Supplement: fig5-data1 [file elife-92409-fig5-data1-v2.zip]

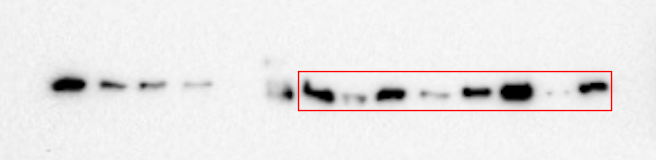

Supplement: fig5-data1 [file elife-92409-fig5-data1-v2.zip]

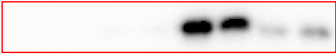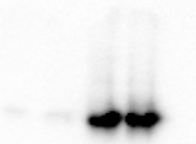

Supplement: fig5-data1 [file elife-92409-fig5-data1-v2.zip]

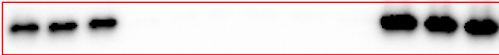

Supplement: fig5-data1 [file elife-92409-fig5-data1-v2.zip]

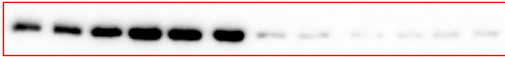

Supplement: fig5-data1 [file elife-92409-fig5-data1-v2.zip]

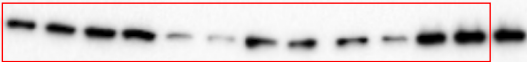

Supplement: fig5-data1 [file elife-92409-fig5-data1-v2.zip]

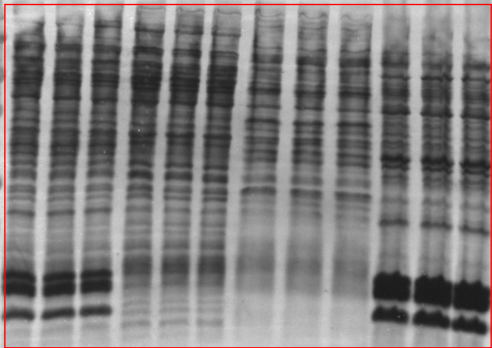

Supplement: fig5-data1 [file elife-92409-fig5-data1-v2.zip]

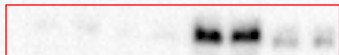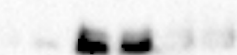

Supplement: fig5-data1 [file elife-92409-fig5-data1-v2.zip]

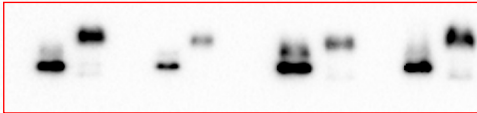

Supplement: fig5-data1 [file elife-92409-fig5-data1-v2.zip]

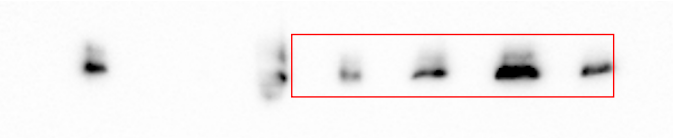

Supplement: fig5-data1 [file elife-92409-fig5-data1-v2.zip]

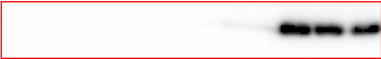

Supplement: fig5-figsupp1-data1 [file elife-92409-fig5-figsupp1-data1-v2.zip]

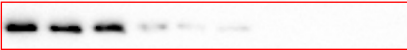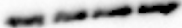

Supplement: fig5-figsupp1-data1 [file elife-92409-fig5-figsupp1-data1-v2.zip]

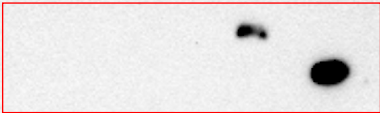

Supplement: fig5-figsupp1-data1 [file elife-92409-fig5-figsupp1-data1-v2.zip]

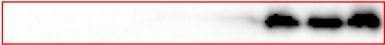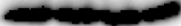

Supplement: fig5-figsupp1-data1 [file elife-92409-fig5-figsupp1-data1-v2.zip]

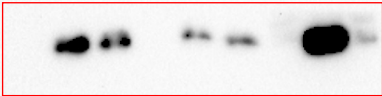

Supplement: fig5-figsupp1-data1 [file elife-92409-fig5-figsupp1-data1-v2.zip]

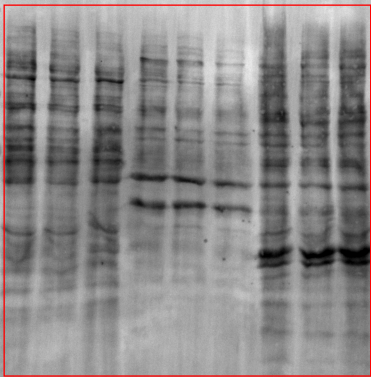

Supplement: fig5-figsupp1-data1 [file elife-92409-fig5-figsupp1-data1-v2.zip]

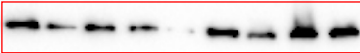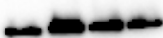

Supplement: fig5-figsupp1-data1 [file elife-92409-fig5-figsupp1-data1-v2.zip]

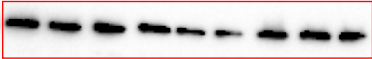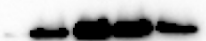

Supplement: fig5-figsupp1-data1 [file elife-92409-fig5-figsupp1-data1-v2.zip]

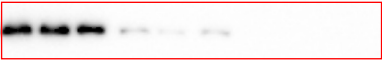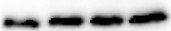

Supplement: fig5-figsupp1-data1 [file elife-92409-fig5-figsupp1-data1-v2.zip]

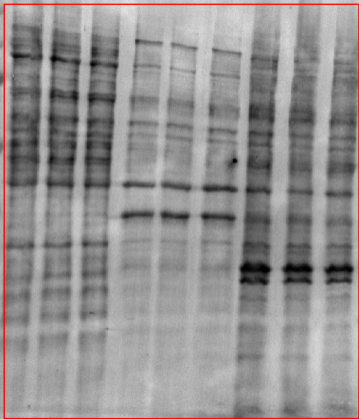

Supplement: fig5-figsupp1-data1 [file elife-92409-fig5-figsupp1-data1-v2.zip]
